# Supplementary material for: TT-10–loaded nanoparticles promote cardiomyocyte proliferation and cardiac repair in a mouse model of myocardial infarction
Source: JCI journal article supplement (doi:10.1172/jci.insight.151987), 2021-10-21
Supplement: sd1 [file 1]

You are being redirected.
